# Supplementary material for: Molecular and serological investigation of the 2021 COVID-19 case surge in Mongolian vaccinees
Source: bioRxiv or medRxiv preprint supplement (doi:10.1101/2021.08.11.21261915), 2021-08-13
Supplement: Supplementary file [file media-1.pdf]

**Supplemental appendix:**

**Samples**

*Nasal swab samples from subjects with breakthrough infections (n=97)*

Samples were collected with informed consent under the auspices of Onom IRB 241 and IRB 242. We obtained nasal swabs from 97 subjects with breakthrough infections after vaccination. Fifty-two (53.6%) were females (average age: 42.8±13.8 years); 45 (48.4%) were males (average age: 41.9±15.5 years). Eighty-four (86.6%) were fully vaccinated i.e. received both (prime and booster) doses of vaccines; 13 (13.4%) received only the first (prime) dose of vaccine prior to breakthrough infection. Out of 84 who received both doses, 53 (63.1%) received Sinopharm, 28 (33.3%) received Covishield/AstraZeneca, 2 (2.4%) received Sputnik, and one (1.2%) received Pfizer/BioNTech.

| Vaccine name    | Sex (M/F) (subject numbers) (n=97) | Age in years (average ± S.D.) | Two doses vaccinee (n=) vs single dose vaccinee (n=) | Interval between second vaccine dose and infection (average days ± S.D.) | Interval between only vaccine dose and infection (average days ± S.D.) | Total SARS-CoV-2 complete genome sequence recovered (n=92) | No. of Alpha variant (n=87) | No. of Delta variant (n=5) |
|-----------------|------------------------------------|-------------------------------|------------------------------------------------------|--------------------------------------------------------------------------|------------------------------------------------------------------------|------------------------------------------------------------|-----------------------------|----------------------------|
| Sinopharm       | M (27)                             | 47.07±15.86                   | 25 vs 2                                              | 40.32±20.6                                                               | 43.50±11.3                                                             |                                                            |                             |                            |
|                 | F (30)                             | 45.8 ±13.53                   | 28 vs 2                                              | 45.58±21.5                                                               | 43.00±16.0                                                             |                                                            |                             |                            |
|                 | Total (57)                         | 46.4 ±14.69                   | 53 vs 2                                              | 43.06±20.6                                                               | 43.25±11.3                                                             | 55                                                         | 54                          | 1                          |
| Covishield      | M (13)                             | 32.3 ±10.92                   | 13 vs 0                                              | 66.85±5.2                                                                | NA                                                                     |                                                            |                             |                            |
|                 | F (15)                             | 39.67±12.64                   | 15 vs 0                                              | 68.38±5.2                                                                | NA                                                                     |                                                            |                             |                            |
|                 | Total (28)                         | 36.25±12.43                   | 28 vs 0                                              | 67.79±53.5                                                               | NA                                                                     | 26                                                         | 23                          | 3                          |
| Sputnik V       | M (4)                              | 36.75±10.54                   | 0 vs 4                                               | NA                                                                       | 50.75±20.2                                                             |                                                            |                             |                            |
|                 | F (4)                              | 41.75±10.73                   | 2 vs 2                                               | 87.00±7.00                                                               | 36.5±0.5                                                               |                                                            |                             |                            |
|                 | Total (8)                          | 39.25±10.92                   | 2 vs 6                                               | 87.00±7.00                                                               | 46±17.8                                                                | 7                                                          | 7                           | 0                          |
| Pfizer BioNTech | M (1)                              | 49.00                         | 1 vs 0                                               | 7.00±0                                                                   | NA                                                                     |                                                            |                             |                            |
|                 | F (3)                              | 29.3±1.24                     | 0 vs 3                                               | NA                                                                       | 25.73±19.7                                                             |                                                            |                             |                            |
|                 | Total (4)                          | 34.25±8.58                    | 1 vs 3                                               | 7.00±0                                                                   | 25.33±19.7                                                             | 4                                                          | 3                           | 1                          |

Supplemental table 1- Demographic information of Covid-19 patients with breakthrough infections

*Plasma samples from healthy vaccinated individuals (n=100)*

Samples were collected with informed consent under the auspices of Onom IRB 241 and IRB 242. Of 100 subjects, 24 (24%) received two doses of Sinopharm, 24 (24%) received two doses of Covishield/AZN, 24 (24%) received two doses of Sputnik, 24 (24%) two doses of Pfizer/BioNTech (prime and booster); 4 (4%) received two doses of Sinopharm and one dose of Pfizer/BioNTech. All samples were tested for anti-spike SARS-CoV-2 antibodies, and anti-nucleocapsid-phosphoprotein SARS-CoV-2 antibodies using

24 EUROIMMUN ELISA kits, and for neutralizing antibodies using an end-point viral  
25 neutralization assay [1].

26

## 27 SARS-CoV-2 Sequencing

28 RNA extracted using QIAcube HT (Qiagen) was employed for SARS-CoV-2 complete  
29 genomic sequencing. Illumina libraries were prepared and enriched for SARS-CoV-2  
30 sequences using Mybaits capture system (Arbor Biosciences) [2]. Captured libraries were  
31 pooled and sequenced on the Illumina Nextseq 2000; and ~6-8 million reads/samples  
32 were generated. After demultiplexing, reads were mapped and aligned against the SARS-  
33 CoV-2 reference sequence (accession no. NC\_045512).

34

35

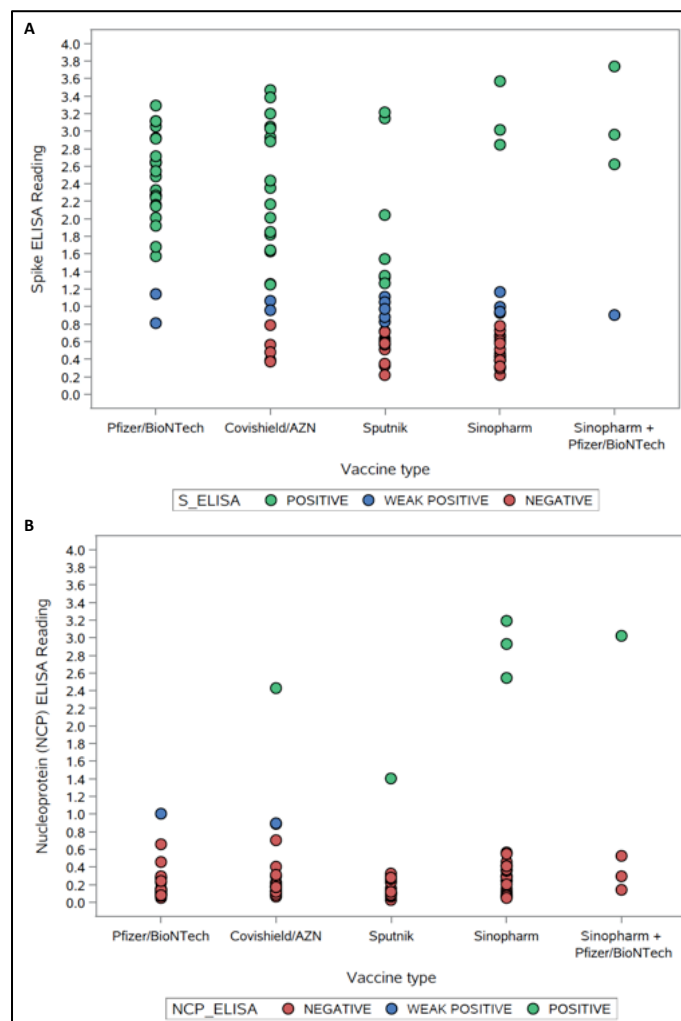

36

37

38 **Supplemental Figure 1.** A] Scatter plot showing EUROIMMUN Anti-SARS-CoV-2 IgG ELISA readings  
39 optical density (O.D.); B] Scatter plot showing EUROIMMUN Anti-SARS-CoV-2 NCP IgG ELISA readings  
40 (O.D.). Negative < 0.8 O.D.; Weak positive 0.8-1.1 O.D.; Positive >1.1 O.D.

41

42

- 43 1. Eckhardt CM, Cummings MJ, Rajagopalan KN, et al. Evaluating the efficacy and safety of  
44 human anti-SARS-CoV-2 convalescent plasma in severely ill adults with COVID-19: A  
45 structured summary of a study protocol for a randomized controlled trial. *Trials*  
46 2020;**21**(1):499 doi: 10.1186/s13063-020-04422-y[published Online First: Epub Date] | .  
47 2. Tillett RL, Sevinsky JR, Hartley PD, et al. Genomic evidence for reinfection with SARS-CoV-2: a  
48 case study. *Lancet Infect Dis* 2021;**21**(1):52-58 doi: 10.1016/S1473-3099(20)30764-  
49 7[published Online First: Epub Date] | .  
50
